# Supplementary material for: Expression pattern of CD11c on lung immune cells after disseminated murine cytomegalovirus infection
Source: Springer Nature journal article supplement (doi:10.1186/s12985-017-0801-x), 2017-07-18

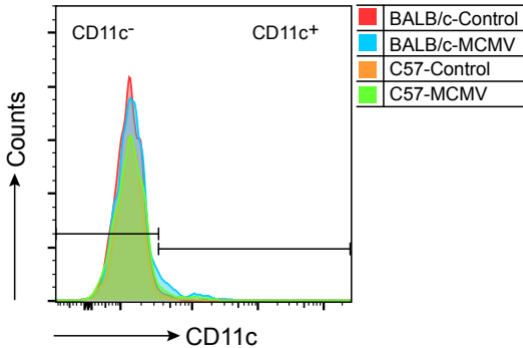

Supplement: MOESM1 [file 13310044]
